# Supplementary material for: Epidemiology of Dengue Disease in Malaysia (2000–2012): A Systematic Literature Review
Source: PubMed Central journal article supplement (PMC4222702; doi:10.1371/journal.pntd.0003159), 2014-11-06
Supplement: pntd.0003159.s002.pdf [file pntd.0003159.s002.pdf]

**Supplementary Table S2. Dengue disease cases and incidence in Malaysia: national data.**

| <b>Year<br/>Population<br/>(1000s)</b> | <b>Cases<br/>reported (n)<br/>(All)</b> | <b>Laboratory-<br/>confirmed<br/>cases (%) (All)</b> | <b>Cases reported<br/>(n) (DF)</b> | <b>Cases reported<br/>(n) (DHF/DSS)</b> | <b>Incidence per<br/>100,000<br/>population (All)</b> | <b>Source of data<br/>First author, year[Ref]</b>                                                                       |
|----------------------------------------|-----------------------------------------|------------------------------------------------------|------------------------------------|-----------------------------------------|-------------------------------------------------------|-------------------------------------------------------------------------------------------------------------------------|
| 2000<br>23,494.9                       | 7103                                    | 52.4                                                 | 6692                               | 411                                     | 31.6                                                  | Anker 2011[16], WHO 2012[13], Dom 2010[21], MOH 2010[9], WHO 2008[3], WHO 2008[18], MOH 2012[12]                        |
| 2001<br>24,123.4                       | 16,368                                  | 53.0                                                 | 15,446                             | 922                                     | 72.1                                                  | Anker 2011[16], WHO 2012[13], Dom 2010[21], MOH 2010[9], WHO 2008[3], WHO 2008[18], MOH 2012[12]                        |
| 2002<br>24,727.1                       | 32,767                                  | 47.3                                                 | 30,807                             | 1960                                    | 133.5                                                 | Anker 2011[16], WHO 2012[13], Dom 2010[21], MOH 2010[9], WHO 2008[3], WHO 2008[18], WHO (multiple years)*, MOH 2012[12] |
| 2003<br>25,320.0                       | 31,545                                  | 49.0                                                 | 30,221                             | 1324                                    | 125.9                                                 | Anker 2011[16], WHO 2012[13], Dom 2010[21], MOH 2010[9], WHO 2008[3], WHO 2008[18], MOH 2012[12]                        |
| 2004<br>25,905.1                       | 33,895                                  | 39.6                                                 | 32,422                             | 1473                                    | 132.5                                                 | Anker 2011[16], WHO 2012[13], Dom 2010[21], MOH 2010[9], WHO 2008[3], WHO 2008[18], MOH 2012[12]                        |
| 2005<br>26,476.9                       | 39,686                                  | 42.7                                                 | 37,646                             | 2040                                    | 150.6                                                 | Anker 2011[16], WHO 2012[13], Dom 2010[21], MOH 2010[9], WHO 2008[3], MOH 2012[12]                                      |
| 2006<br>26,831.5                       | 38,556                                  | 47.3                                                 | 36,462                             | 2094                                    | 148.3                                                 | Arima 2011[17], Anker 2011[16], WHO 2012[13], MOH 2010[9], WHO 2008[3], WHO 2009[19], MOH 2012[12]                      |
| 2007<br>27,186.0                       | 48,846                                  | 48.7                                                 | 45,856                             | 2990                                    | 180.0                                                 | Arima 2011[17], Anker 2011[16], MOH 2010[9], WHO 2008[3], WHO 2009[19], MOH 2012[12]                                    |

| <b>Year<br/>Population<br/>(1000s)</b> | <b>Cases<br/>reported (n)<br/>(All)</b> | <b>Laboratory-<br/>confirmed<br/>cases (%) (All)</b> | <b>Cases reported<br/>(n) (DF)</b> | <b>Cases reported<br/>(n) (DHF/DSS)</b> | <b>Incidence per<br/>100,000<br/>population (All)</b> | <b>Source of data<br/>First author, year[Ref]</b>        |
|----------------------------------------|-----------------------------------------|------------------------------------------------------|------------------------------------|-----------------------------------------|-------------------------------------------------------|----------------------------------------------------------|
| 2008<br>27,540.5                       | 49,335                                  |                                                      | 46,517                             | 2818                                    | 178.0                                                 | Arima 2011[17], Anker 2011[16], MOH 2012[12]             |
| 2009<br>27,895.3                       | 41,486                                  |                                                      | 38,749                             | 2737                                    | 147.0                                                 | Arima 2011[17], WHO 2011[23], WHO 2012[2], MOH 2012[12]  |
| 2010<br>28,250.5                       | 46,171                                  |                                                      | 42,140                             | 4031                                    | 159.7                                                 | Arima 2011[17], WHO 2011[20], WHO 2011[23], MOH 2012[12] |
| 2011<br>28,552.7                       | 19,884                                  |                                                      | 18,466                             | 1418                                    | 69.6                                                  | MOH 2012[12]                                             |
| 2011 (to<br>31/1/11)                   | 2084                                    |                                                      |                                    |                                         |                                                       | WHO 2012[2]                                              |
| 2012 (to<br>31/1/12)<br>28,854.9       | 1868                                    |                                                      |                                    |                                         |                                                       | WHO 2012[2]                                              |

DF, dengue fever; DHF, dengue haemorrhagic fever; DSS, dengue shock syndrome. \*World Health Organization. Number of reported cases of dengue fever and dengue hemorrhagic fever (DF/DHF) in the Western Pacific Region, by country. India: World Health Organization (several years).
