# Supplementary material for: Epidemiology of Dengue Disease in Malaysia (2000–2012): A Systematic Literature Review
Source: PubMed Central journal article supplement (PMC4222702; doi:10.1371/journal.pntd.0003159), 2014-11-06
Supplement: pntd.0003159.s003.pdf [file pntd.0003159.s003.pdf]

**Supplementary Table S3. Dengue-related deaths and case-fatality rates in Malaysia: national data.**

| Year | Death cases (n) |         |     | Case fatality rate (%) |         |      | Source of data                                       |
|------|-----------------|---------|-----|------------------------|---------|------|------------------------------------------------------|
|      | DF              | DHF/DSS | All | DF                     | DHF/DSS | All  | First author, year[Ref]                              |
| 2000 | 0               | 45      | 45  | 0                      | 10.9    | 0.63 | Dom 2010[21], MOH 2010[9], WHO 2008[3], MOH 2012[12] |
| 2001 | 0               | 50      | 50  | 0                      | 5.4     | 0.31 | Dom 2010[21], MOH 2010[9], WHO 2008[3], MOH 2012[12] |
| 2002 | 0               | 99      | 99  | 0                      | 5.1     | 0.30 | Dom 2010[21], MOH 2010[9], WHO 2008[3], MOH 2012[12] |
| 2003 | 0               | 72      | 72  | 0                      | 5.4     | 0.23 | Dom 2010[21], MOH 2010[9], WHO 2008[3], MOH 2012[12] |
| 2004 | 0               | 102     | 102 | 0                      | 6.9     | 0.30 | Dom 2010[21], MOH 2010[9], WHO 2008[3], MOH 2012[12] |
| 2005 | 0               | 107     | 107 | 0                      | 5.2     | 0.27 | Dom 2010[21], MOH 2010[9], WHO 2008[3], MOH 2012[12] |
| 2006 | 0               | 92      | 92  | 0                      | 4.4     | 0.24 | Dom 2010[21], MOH 2010[9], WHO 2008[3], MOH 2012[12] |
| 2007 | 0               | 98      | 98  | 0                      | 3.3     | 0.20 | Dom 2010[21], MOH 2010[9], WHO 2008[3], MOH 2012[12] |
| 2008 | 0               | 112     | 112 | 0                      | 4.0     | 0.23 | Arima 2011[17], MOH 2012[12]                         |
| 2009 | 0               | 88      | 88  | 0                      | 3.2     | 0.21 | Arima 2011[17], MOH 2012[12]                         |
| 2010 | 0               | 134     | 134 | 0                      | 3.3     | 0.29 | Arima 2011[17], MOH 2012[12]                         |
| 2011 | 0               | 36      | 36  | 0                      | 2.5     | 0.18 | MOH 2012[12]                                         |

DF, dengue fever; DHF, dengue haemorrhagic fever; DSS, dengue shock syndrome.
